# Supplementary material for: Structural and Functional Neuroplasticity Following Bilateral Vestibular Loss: A Longitudinal [18F]-UCB-H/[18F]-FDG Dual Tracer Rat Study
Source: Research Square preprint supplement (doi:10.21203/rs.3.rs-1110079/v1), 2021-12-13
Supplement: Supplementary file 1 [file e10d332193770801d10c2087.docx]

**SUPPLEMENTARY FIGURES**

**
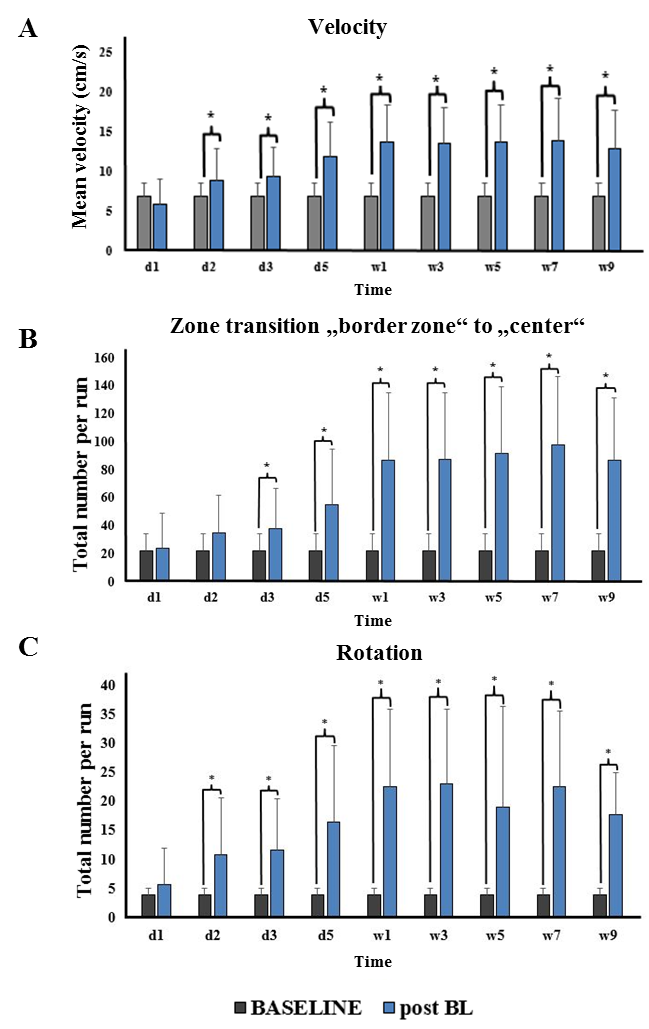
**

**Supplementary Figure 1**: Behavioural parameters for the entire group of rats in the open field. A) Locomotor velocity from baseline to 9 weeks post BL. B) Total number of zone transition from border to center zone at different time points post BL compared to baseline. C) Total number of rotations per run at different time points post BL. Values are depicted as mean + standard deviation; *significant difference (p<0.05). BL: bilateral labyrinthectomy, d: day, w: week.

**
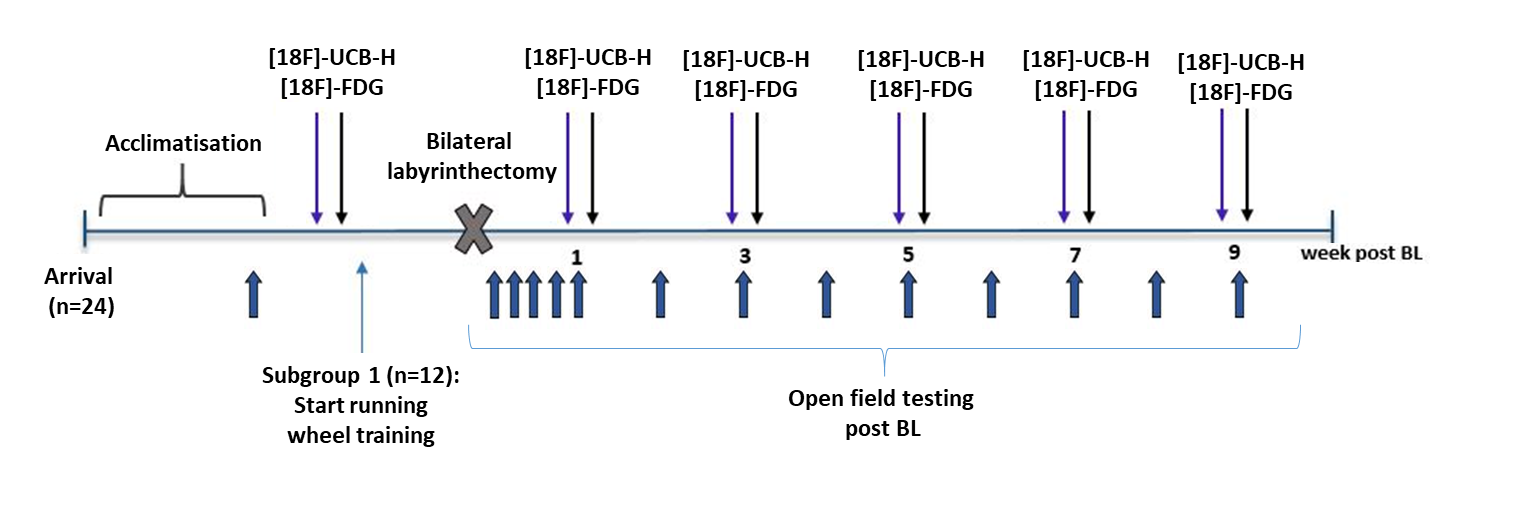
**

**Supplementary Figure 2**: Experimental protocol.
